# Supplementary material
Source: HighWire-hosted journal article supplement (https://www.jneurosci.org/highwire/filestream/601302/field_highwire_adjunct_files/0/Supplemental_Figure.pdf)
Supplement: Supplemental_Figure.pdf [file Supplemental_Figure.pdf]

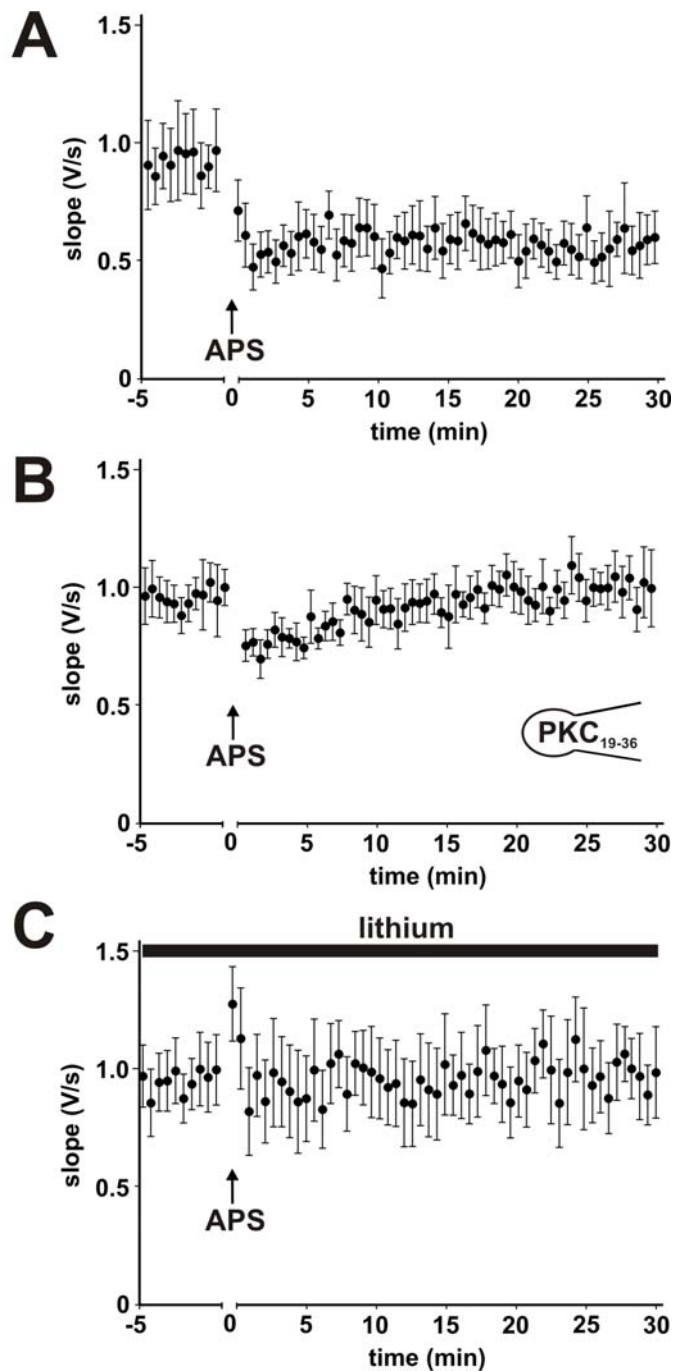

*Supplementary Figure: Slope analysis*

The initial slope for the interval of 20 - 40% of the maximal EPSP amplitude was analyzed for the experiments from Fig. 1 C, 1 E and 3 B. (A) The associative pairing protocol resulted in a significant LTD of the EPSP slopes. (B) Intracellular application of the PKC-inhibitor PKC<sub>19-36</sub> (10  $\mu$ M) prevented the induction of a significant depression of the EPSP slopes. (C) Lithium (2 mM) equally inhibited LTD.
